# Supplementary material for: Concomitant Use of Statins in Tocilizumab-Treated Patients with Rheumatoid Arthritis: A Post Hoc Analysis
Source: PubMed Central journal article supplement — Rheumatol Ther. 2016 Nov 29;4(1):133–49. doi: 10.1007/s40744-016-0049-8 (PMC5443718; doi:10.1007/s40744-016-0049-8), 2016-11-29
Supplement: 40744_2016_49_MOESM1_ESM.pdf [file 40744_2016_49_MOESM1_ESM.pdf]

**SUPPLEMENTARY MATERIAL**

**Table S1.** Summary of Lipid Changes With Tocilizumab in Clinical Trials of RA

| Clinical Study, Publication Year (reference) | Study Population                   | Primary Outcome                                                      | Findings in Patients Treated With TCZ                                                                                                         |
|----------------------------------------------|------------------------------------|----------------------------------------------------------------------|-----------------------------------------------------------------------------------------------------------------------------------------------|
| CHARISMA, 2006 [21]                          | MTX-IR                             | The proportion of patients who achieved an ACR20 response at week 16 | Moderate reversible ↑ in mean levels of fasting TC, HDL-C, and TGs in groups receiving TCZ; mean atherogenic index remained largely unchanged |
|                                              | TCZ 2 mg/kg ( <i>n</i> = 53)       |                                                                      |                                                                                                                                               |
|                                              | TCZ 4 mg/kg ( <i>n</i> = 54)       |                                                                      |                                                                                                                                               |
|                                              | TCZ 8 mg/kg ( <i>n</i> = 52)       |                                                                      |                                                                                                                                               |
|                                              | TCZ 2 mg/kg + MTX ( <i>n</i> = 52) |                                                                      |                                                                                                                                               |
|                                              | TCZ 4 mg/kg + MTX ( <i>n</i> = 49) |                                                                      |                                                                                                                                               |
|                                              | TCZ 8 mg/kg + MTX ( <i>n</i> = 50) |                                                                      |                                                                                                                                               |
| SAMURAI, 2007 [22]                           | MTX ( <i>n</i> = 49)               | Mean change in total modified Sharp scores from baseline to week 52  | ↑ TC, TGs, LDL-C, and HDL-C levels were reported in 38%, 17%, 26%, and 24% of patients in the TCZ groups, respectively                        |
|                                              | csDMARD-IR patients                |                                                                      |                                                                                                                                               |
|                                              | TCZ 8 mg/kg ( <i>n</i> = 803)      |                                                                      |                                                                                                                                               |
|                                              | csDMARD ( <i>n</i> = 413)          |                                                                      | No change in atherogenic index (TC/HDL-C); no CV complications observed in association with abnormal lipids                                   |

*Statin Use in TCZ-Treated Patients With RA*

|                     |                                                                                                                                              |                                                                                                   |                                                                                                                                                                                                                                                 |
|---------------------|----------------------------------------------------------------------------------------------------------------------------------------------|---------------------------------------------------------------------------------------------------|-------------------------------------------------------------------------------------------------------------------------------------------------------------------------------------------------------------------------------------------------|
| OPTION, 2008 [13]   | <p>MTX-IR</p> <p>TCZ 4 mg/kg + MTX (<i>n</i> = 213)</p> <p>TCZ 8 mg/kg + MTX (<i>n</i> = 205)</p> <p>PBO + MTX (<i>n</i> = 204)</p>          | <p>The proportion of patients who achieved an ACR20 response at week 24</p>                       | <p>↑ Mean plasma concentrations of TC, HDL-C, and LDL-C from baseline to week 6 in patients treated with TCZ, which remained elevated at weeks 14 and 24</p> <p>Elevations in cholesterol coincided with moderate to large decreases in CRP</p> |
| TOWARD, 2008 [15]   | <p>csDMARD-IR patients</p> <p>TCZ 8 mg/kg + csDMARD (<i>n</i> = 803)</p> <p>PBO + csDMARD (<i>n</i> = 413)</p>                               | <p>The proportion of patients who achieved an ACR20 response at week 24</p>                       | <p>↑ Proportion of patients shifted to higher elevations from BL for TC (&lt;240 to ≥240 mg/dl), LDL-C (&lt;160 to ≥160 mg/dl), and HDL-C (&lt;60 to ≥60 mg/dl) vs PBO</p>                                                                      |
| AMBITION, 2010 [16] | <p>MTX experienced</p> <p>TCZ 8 mg/kg (<i>n</i> = 288)</p> <p>MTX (<i>n</i> = 284)</p>                                                       | <p>The proportion of patients who achieved an ACR20 response at week 24</p>                       | <p>↑ Proportion of patients shifted to higher elevations from BL for TC (&lt;200 to ≥240 mg/dl) and LDL-C (&lt;100 to ≥160 mg/dl) vs MTX</p>                                                                                                    |
| LITHE, 2011 [17]    | <p>MTX experienced</p> <p>TCZ 8 mg/kg + MTX (<i>n</i> = 399)</p> <p>TCZ 4 mg/kg + MTX (<i>n</i> = 399)</p> <p>PBO + MTX (<i>n</i> = 392)</p> | <p>Change from baseline in total Genant-modified Sharp score and physical function to week 52</p> | <p>↑ Proportion of patients shifted to higher elevations from BL for TC (&lt;240 to ≥240 mg/dl), LDL-C (&lt;160 to ≥160 mg/dl), and HDL-C (&lt;60 to ≥60 mg/dl) vs MTX</p>                                                                      |
| REACTION, 2011 [23] | <p>TCZ 8 mg/kg ± MTX at investigator's discretion (<i>n</i> = 229)</p>                                                                       | <p>Change in DAS28-ESR from baseline to week 24</p>                                               | <p>TCZ + MTX (<i>n</i> = 86):</p>                                                                                                                                                                                                               |

Statin Use in TCZ-Treated Patients With RA

|                   |                                                                                                                |                                                                                             |                                                                                                                                                                                                              |
|-------------------|----------------------------------------------------------------------------------------------------------------|---------------------------------------------------------------------------------------------|--------------------------------------------------------------------------------------------------------------------------------------------------------------------------------------------------------------|
|                   |                                                                                                                |                                                                                             | <p>↑ mean TC 17.7 mg/dl vs BL</p> <p>TCZ monotherapy (<i>n</i> = 80):</p> <p>↑ mean TC 12.9 mg/dl vs BL</p> <p>↑ Mean TC, TGs, HDL-C, and LDL-C were mild; changes clinically significant in 15 patients</p> |
| TAMARA, 2011 [24] | TCZ 8 mg/kg ( <i>n</i> = 286)                                                                                  | The proportion of patients who achieved low disease activity scores (DAS28 ≤3.2) at week 24 | <p>TNFi pretreatment (<i>n</i> = 119)</p> <p>↑ LDL-C in 30.3%; ↑ LDL-C &gt;160 mg/dl in 24.4%</p> <p>csDMARD pretreatment (<i>n</i> = 163)</p> <p>↑ LDL-C in 25.8%; ↑ LDL-C &gt;160 mg/dl in 20.2%</p>       |
| ROSE, 2012 [25]   | <p>csDMARD-IR patients</p> <p>TCZ 8 mg/kg + csDMARD (<i>n</i> = 412)</p> <p>PBO + csDMARD (<i>n</i> = 207)</p> | The proportion of patients who achieved an ACR50 response at week 24                        | <p>↑ Mean TC, LDL-C, HDL-C, and TC vs PBO; most of the increase was within the first 4-8 weeks of therapy and plateaued by weeks 12-16</p>                                                                   |
| ADACTA, 2013 [20] | <p>MTX-IR patients</p> <p>TCZ 8 mg/kg + PBO (<i>n</i> = 163)</p>                                               | Change in DAS28 from baseline to week 24                                                    | <p>↑ Mean LDL-C vs ADA</p>                                                                                                                                                                                   |

*Statin Use in TCZ-Treated Patients With RA*

|                                     | ADA 40 mg + PBO ( <i>n</i> = 162)                                                                                  |                                                                                                                                                                                        |                                                                                                                                                                          |
|-------------------------------------|--------------------------------------------------------------------------------------------------------------------|----------------------------------------------------------------------------------------------------------------------------------------------------------------------------------------|--------------------------------------------------------------------------------------------------------------------------------------------------------------------------|
|                                     | MTX-IR                                                                                                             |                                                                                                                                                                                        |                                                                                                                                                                          |
| ACT-RAY, 2013 [26]                  | TCZ + MTX ( <i>n</i> = 277)                                                                                        | DAS28-ESR remission rate at week 24                                                                                                                                                    | ↑ Mean TC levels from 93.1 vs 92.7 mg/dl at baseline to 102.4 vs 103.5 mg/dl at week 24 in the TCZ + MTX vs TCZ + PBO groups                                             |
|                                     | TCZ + PBO ( <i>n</i> = 276)                                                                                        |                                                                                                                                                                                        |                                                                                                                                                                          |
|                                     | MTX-IR patients                                                                                                    |                                                                                                                                                                                        |                                                                                                                                                                          |
| MEASURE, 2015 [27]                  | TCZ 8 mg/kg + MTX ( <i>n</i> = 69)                                                                                 | Change from baseline in pulse wave velocity (vascular function) and small LDL particle number at week 12                                                                               | ↑ TC, TGs, and LDL-C vs PBO<br>↓ HDL-SAA, sPLA2-IIA, lipoprotein(a), and fibrinogen vs PBO                                                                               |
|                                     | PBO + MTX ( <i>n</i> = 63)                                                                                         |                                                                                                                                                                                        |                                                                                                                                                                          |
| <b>SC Studies, Year [reference]</b> | <b>Study Population</b>                                                                                            | <b>Primary Outcome</b>                                                                                                                                                                 | <b>Findings</b>                                                                                                                                                          |
|                                     |                                                                                                                    |                                                                                                                                                                                        | ↑ Proportion of patients in TCZ-SC group shifted to higher elevations from BL for TC vs TCZ-IV group (<200 to ≥200 mg/dl; largest categorical shift: <200 to ≥240 mg/dl) |
| SUMMACTA, 2014 [19]                 | csDMARD-IR patients<br>TCZ-SC + PBO-IV ( <i>n</i> = 631)<br>TCZ-IV + PBO-SC ( <i>n</i> = 631)                      | To demonstrate the noninferiority of TCZ-SC to TCZ-IV with regard to the proportion of patients in each group achieving an ACR20 response at week 24 using a 12% noninferiority margin | Clinically relevant shifts in LDL-C, HDL-C, and TGs were similar between groups                                                                                          |
| SUMMACTA OLE, 2015 [28]             | csDMARD-IR patients initially randomized to TCZ-SC or TCZ-IV were re-randomized to TCZ-SC or TCZ-IV <sup>a</sup> : | 72-week OLE to assess the maintenance of clinical responses and safety through week 97                                                                                                 | The proportion of patients reporting shifts in TC, LDL-C, HDL-C, and TGs after initiation of TCZ was higher in the TCZ-SC arm than in the TCZ-IV arm at                  |

Statin Use in TCZ-Treated Patients With RA

|                                                         |                                                                                                                                                              |                                                                                                                                                                                                                 |                                                                                                                                                                                                   |
|---------------------------------------------------------|--------------------------------------------------------------------------------------------------------------------------------------------------------------|-----------------------------------------------------------------------------------------------------------------------------------------------------------------------------------------------------------------|---------------------------------------------------------------------------------------------------------------------------------------------------------------------------------------------------|
|                                                         | TCZ-SC ( <i>n</i> = 521)                                                                                                                                     |                                                                                                                                                                                                                 | week 97 (TC, 26.1% vs 21.0%; LDL-C, 27.7% vs 23.2%; HDL-C, 3.2% vs 3.9%; and TGs, 23.8% vs 17.5%)                                                                                                 |
|                                                         | TCZ-SC → IV ( <i>n</i> = 48)                                                                                                                                 |                                                                                                                                                                                                                 |                                                                                                                                                                                                   |
|                                                         | TCZ-IV ( <i>n</i> = 372)                                                                                                                                     |                                                                                                                                                                                                                 |                                                                                                                                                                                                   |
|                                                         | TCZ-IV → SC ( <i>n</i> = 186)                                                                                                                                |                                                                                                                                                                                                                 |                                                                                                                                                                                                   |
| BREVACTA, 2014 [18]                                     | csDMARD-IR patients<br>TCZ-SC + csDMARDs ( <i>n</i> = 437)<br>PBO-SC + csDMARDs ( <i>n</i> = 219)                                                            | The proportion of patients who achieved an ACR20 response at week 24                                                                                                                                            | ↑ Proportion of patients shifted to higher elevations from BL for TC (<200 to ≥240 mg/dl), LDL-C (<100 to ≥160 mg/dl), and TGs (<150 to ≥150 mg/dl) vs PBO                                        |
| BREVACTA OLE (Kivitz A, unpublished observations, 2015) | csDMARD-IR patients initially randomized to TCZ-SC or PBO received open-label TCZ-SC<br>Continued TCZ-SC ( <i>n</i> = 338)<br>PBO → TCZ-SC ( <i>n</i> = 119) | 72-week OLE to assess the maintenance of clinical responses and safety through week 96                                                                                                                          | Patients who switched from placebo to TCZ-SC at week 24 experienced shifts in levels of lipid parameters similar to those in patients who were randomized to TCZ-SC in the initial 24-week period |
| MUSASHI, 2014 [29]                                      | csDMARD-IR patients<br>TCZ-SC monotherapy ( <i>n</i> = 173)<br>TCZ-IV monotherapy ( <i>n</i> = 173)                                                          | To demonstrate the noninferiority of TCZ-SC monotherapy to TCZ-IV monotherapy with regard to the proportion of patients in each group achieving an ACR20 response at week 24 using an 18% noninferiority margin | Shift from baseline (TCZ-SC):<br>TC (<200 to ≥240 mg/dl), <i>n</i> = 32/136<br>HDL-C (<40 to ≥60 mg/dl), <i>n</i> = 0/29<br>LDL-C (<100 to ≥160 mg/dl), <i>n</i> = 1/93                           |

Statin Use in TCZ-Treated Patients With RA

|                        |                                                                                                                      |                                                                                         |                                              |
|------------------------|----------------------------------------------------------------------------------------------------------------------|-----------------------------------------------------------------------------------------|----------------------------------------------|
|                        |                                                                                                                      |                                                                                         | Shift from baseline, (TCZ-IV):               |
|                        |                                                                                                                      |                                                                                         | TC (<200 to ≥240 mg/dl), <i>n</i> = 35/130   |
|                        |                                                                                                                      |                                                                                         | HDL-C (<40 to ≥60 mg/dl), <i>n</i> = 0/14    |
|                        |                                                                                                                      |                                                                                         | LDL-C (<100 to ≥160 mg/dl), <i>n</i> = 4/73  |
|                        |                                                                                                                      |                                                                                         | Shift from baseline:                         |
|                        |                                                                                                                      |                                                                                         | TC (<200 to ≥240 mg/dl), <i>n</i> = 32/266   |
|                        |                                                                                                                      |                                                                                         | HDL-C (<40 to ≥60 mg/dl), <i>n</i> = 5/43    |
|                        |                                                                                                                      |                                                                                         | LDL-C (<100 to ≥160 mg/dl), <i>n</i> = 4/166 |
| MUSASHI LTE, 2015 [30] | Patients previously received 24 weeks of double-blind treatment with either TCZ-SC monotherapy or TCZ-IV monotherapy | 84-week OLE to assess the maintenance of clinical responses and safety through week 108 |                                              |
|                        | TCZ-SC monotherapy ( <i>n</i> = 346)                                                                                 |                                                                                         |                                              |

---

*ACR20* 20% improvement in response per the American College of Rheumatology criteria, *ADA* adalimumab, *BL* baseline, *CRP* C-reactive protein, *csDMARD*, conventional synthetic disease-modifying antirheumatic drug, *CV* cardiovascular, *DAS28-ESR* disease activity score in 28 joints using the erythrocyte sedimentation rate, *HDL-C* high-density-lipoprotein cholesterol, *HDL-SAA* HDL-associated serum amyloid A, *IR* inadequate response, *IV* intravenous, *LDL-C* low-density-lipoprotein cholesterol, *LTE* long-term extension, *MTX* methotrexate, *OLE* open-label extension, *PBO* placebo, *SC* subcutaneous, *sPLA2-IIA* secreted phospholipase A2-IIA, *TC* total cholesterol, *TCZ* tocilizumab, *TG* triglyceride, *TNFi* tumor necrosis factor inhibitor.

*Statin Use in TCZ-Treated Patients With RA*

<sup>a</sup> After a 24-week double-blind period, patients receiving TCZ-SC were re-randomized 11:1 to TCZ-SC or TCZ-IV (TCZ-SC → IV), and patients receiving TCZ-IV were re-randomized 2:1 to TCZ-IV or TCZ-SC (TCZ-IV → SC).

**Table S2.** Classification of Fasting Lipid Parameters and Cardiovascular Risk

| National Cholesterol Education Program ATP III Classification |                 |              |                                |              |        |            |           |
|---------------------------------------------------------------|-----------------|--------------|--------------------------------|--------------|--------|------------|-----------|
| TC, mg/dl                                                     |                 | LDL-C, mg/dl |                                | HDL-C, mg/dl |        | TGs, mg/dl |           |
| <200                                                          | Desirable       | <100         | Optimal                        | <40          | Low    | <150       | Normal    |
| 200-239                                                       | Borderline high | 100-129      | Near optimal/<br>above optimal | 40-59        | Normal | 150-499    | High      |
| ≥240                                                          | High            | 130-159      | Borderline high                | ≥60          | High   | ≥500       | Very high |
| —                                                             | —               | 160-189      | High                           | —            | —      | —          | —         |
| —                                                             | —               | ≥190         | Very high                      | —            | —      | —          | —         |
| TC:HDL-C and Risk—Framingham Heart Study                      |                 |              |                                |              |        |            |           |
| TC:HDL-C Ratio                                                |                 | Ideal        |                                | Moderate     |        | High       |           |
| Men                                                           |                 | <3.5         |                                | 3.5-5.0      |        | >5.0       |           |
| Women                                                         |                 | <3.0         |                                | 3.0-4.4      |        | >4.4       |           |



*Statin Use in TCZ-Treated Patients With RA*

*ATP* Adult Treatment Panel, *HDL-C* high-density-lipoprotein cholesterol, *LDL-C* low-density-lipoprotein cholesterol, *TC* total cholesterol, *TG* triglyceride.

**Table S3.** Description of Statin Use Over Time by TCZ Treatment Group (safety population)

| Statin Use, <i>n</i> (%)           | csDMARD Monotherapy<br>( <i>N</i> = 1361) | TCZ-IV 8 mg/kg q4w<br>Monotherapy<br>( <i>N</i> = 450) | TCZ-IV 8 mg/kg q4w +<br>csDMARD<br>( <i>N</i> = 2213) | TCZ-SC 162 mg qw +<br>csDMARD<br>( <i>N</i> = 631) |
|------------------------------------|-------------------------------------------|--------------------------------------------------------|-------------------------------------------------------|----------------------------------------------------|
| Baseline, <i>n</i>                 | 1361                                      | 450                                                    | 2213                                                  | 631                                                |
| Simvastatin                        | 41 (3.0)                                  | 17 (3.8)                                               | 80 (3.6)                                              | 29 (4.6)                                           |
| Atorvastatin                       | 35 (2.6)                                  | 12 (2.7)                                               | 70 (3.2)                                              | 20 (3.2)                                           |
| Rosuvastatin                       | 6 (0.4)                                   | 5 (1.1)                                                | 21 (0.9)                                              | 8 (1.3)                                            |
| Pravastatin                        | 7 (0.5)                                   | 5 (1.1)                                                | 21 (0.9)                                              | 6 (1.0)                                            |
| Lovastatin                         | 3 (0.2)                                   | 1 (0.2)                                                | 13 (0.6)                                              | 5 (0.8)                                            |
| Ezetimibe/simvastatin              | 3 (0.2)                                   | 1 (0.2)                                                | 16 (0.7)                                              | 3 (0.5)                                            |
| Other <sup>a</sup>                 | 4 (0.3)                                   | 2 (0.4)                                                | 10 (0.5)                                              | 1 (0.2)                                            |
| Total                              | 99 (7.3)                                  | 42 (9.3)                                               | 230 (10.4)                                            | 72 (11.4)                                          |
| Post-baseline 3-4 months, <i>n</i> | 1330                                      | 432                                                    | 2184                                                  | 614                                                |
| Simvastatin                        | 43 (3.2)                                  | 24 (5.6)                                               | 91 (4.2)                                              | 41 (6.7)                                           |
| Atorvastatin                       | 38 (2.9)                                  | 14 (3.2)                                               | 87 (4.0)                                              | 22 (3.6)                                           |
| Rosuvastatin                       | 7 (0.5)                                   | 7 (1.6)                                                | 27 (1.2)                                              | 9 (1.5)                                            |
| Pravastatin                        | 8 (0.6)                                   | 6 (1.4)                                                | 21 (1.0)                                              | 6 (1.0)                                            |
| Lovastatin                         | 3 (0.2)                                   | 1 (0.2)                                                | 15 (0.7)                                              | 5 (0.8)                                            |
| Ezetimibe/simvastatin              | 3 (0.2)                                   | 4 (0.9)                                                | 20 (0.9)                                              | 3 (0.5)                                            |
| Other <sup>a</sup>                 | 5 (0.4)                                   | 2 (0.5)                                                | 10 (0.5)                                              | 2 (0.3)                                            |
| Total                              | 107 (8.0)                                 | 54 (12.5)                                              | 264 (12.0)                                            | 88 (14.3)                                          |
| Post-baseline 6 months, <i>n</i>   | 980                                       | 415                                                    | 2099                                                  | 593                                                |
| Simvastatin                        | 35 (3.6)                                  | 26 (6.3)                                               | 88 (4.2)                                              | 44 (7.4)                                           |
| Atorvastatin                       | 24 (2.4)                                  | 15 (3.6)                                               | 82 (3.9)                                              | 22 (3.7)                                           |
| Rosuvastatin                       | 6 (0.6)                                   | 8 (1.9)                                                | 28 (1.3)                                              | 10 (1.7)                                           |
| Pravastatin                        | 9 (0.9)                                   | 6 (1.4)                                                | 19 (0.9)                                              | 6 (1.0)                                            |
| Lovastatin                         | 1 (0.1)                                   | 1 (0.2)                                                | 16 (0.8)                                              | 4 (0.7)                                            |
| Ezetimibe/simvastatin              | 3 (0.3)                                   | 4 (1.0)                                                | 21 (1.0)                                              | 3 (0.5)                                            |
| Other <sup>a</sup>                 | 4 (0.4)                                   | 2 (0.5)                                                | 13 (0.6)                                              | 2 (0.3)                                            |
| Total                              | 82 (8.4)                                  | 60 (14.5)                                              | 262 (12.4)                                            | 90 (15.2)                                          |
| Post-baseline 12 months, <i>n</i>  | 195                                       | 169                                                    | 1745                                                  | 510                                                |
| Simvastatin                        | 6 (3.1)                                   | 4 (2.4)                                                | 80 (4.6)                                              | 39 (7.6)                                           |
| Atorvastatin                       | 4 (2.1)                                   | 2 (1.2)                                                | 74 (4.2)                                              | 23 (4.5)                                           |
| Rosuvastatin                       | 1 (0.5)                                   | 1 (0.6)                                                | 24 (1.4)                                              | 8 (1.6)                                            |
| Pravastatin                        | 2 (1.0)                                   | 2 (1.2)                                                | 16 (0.9)                                              | 8 (1.6)                                            |
| Lovastatin                         | 0                                         | 1 (0.6)                                                | 16 (0.9)                                              | 3 (0.6)                                            |
| Ezetimibe/simvastatin              | 1 (0.5)                                   | 2 (1.2)                                                | 25 (1.4)                                              | 2 (0.4)                                            |

*Statin Use in TCZ-Treated Patients With RA*

|                                    |          |           |            |           |
|------------------------------------|----------|-----------|------------|-----------|
| Other <sup>a</sup>                 | 1 (0.5)  | 0         | 10 (0.6)   | 2 (0.4)   |
| Total                              | 15 (7.7) | 12 (7.1)  | 239 (13.7) | 85 (16.7) |
| Post-baseline 2 years,<br><i>n</i> | 22       | 145       | 1555       | 453       |
| Simvastatin                        | 0        | 5 (3.4)   | 97 (6.2)   | 35 (7.7)  |
| Atorvastatin                       | 1 (4.5)  | 7 (4.8)   | 75 (4.8)   | 23 (5.1)  |
| Rosuvastatin                       | 0        | 0         | 25 (1.6)   | 6 (1.3)   |
| Pravastatin                        | 0        | 3 (2.1)   | 23 (1.5)   | 10 (2.2)  |
| Lovastatin                         | 0        | 1 (0.7)   | 11 (0.7)   | 4 (0.9)   |
| Ezetimibe/simvastatin              | 0        | 2 (1.4)   | 18 (1.2)   | 1 (0.2)   |
| Other <sup>a</sup>                 | 0        | 2 (1.4)   | 7 (0.5)    | 0         |
| Total                              | 1 (4.5)  | 20 (13.8) | 248 (15.9) | 79 (17.4) |

*csDMARD* conventional synthetic disease-modifying antirheumatic drug, *IV* intravenous, *qw* every week, *q4w* every 4 weeks, *SC* subcutaneous, *TCZ* tocilizumab.

<sup>a</sup> Other lipid-lowering agents and statins used during the study include fluvastatin, amlodipine/atorvastatin, lovastatin/nicotinic acid, fluvastatin sodium, atorvastatin/ezetimibe, amlodipine besylate/atorvastatin calcium, and statin nitric oxide synthetase/unsaturated fatty acids.

**Fig. S1.** Mean TC levels over time in patients who were on statins at baseline **(a)**, patients who initiated statins post-baseline **(b)**, and patients who were untreated with statins at any time **(c)**.

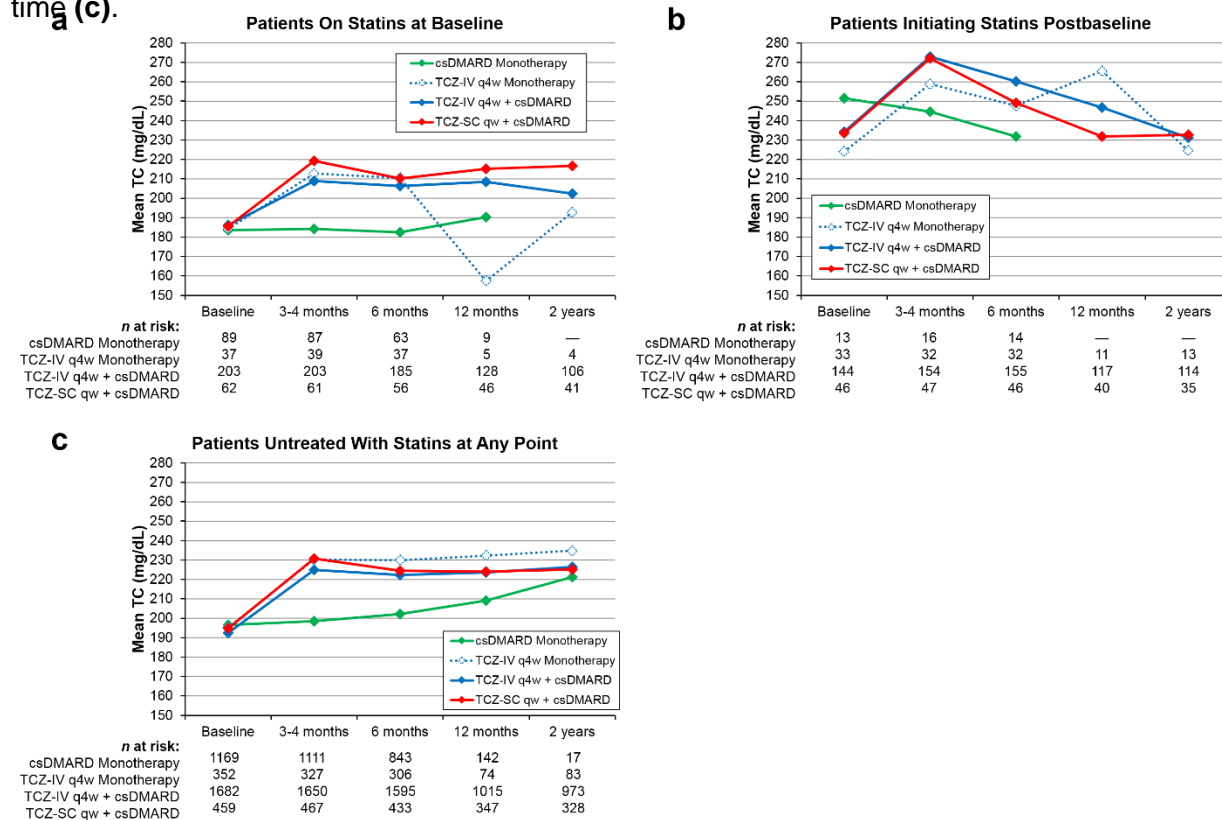

csDMARD conventional disease-modifying antirheumatic drug, IV intravenous, qw every week, q4w every 4 weeks, SC subcutaneous, TC total cholesterol, TCZ tocilizumab.

**Fig. S2.** Mean HDL-C levels over time in patients who were on statins at baseline **(a)**, patients who initiated statins post-baseline **(b)**, and patients who were untreated with statins at any time **(c)**.

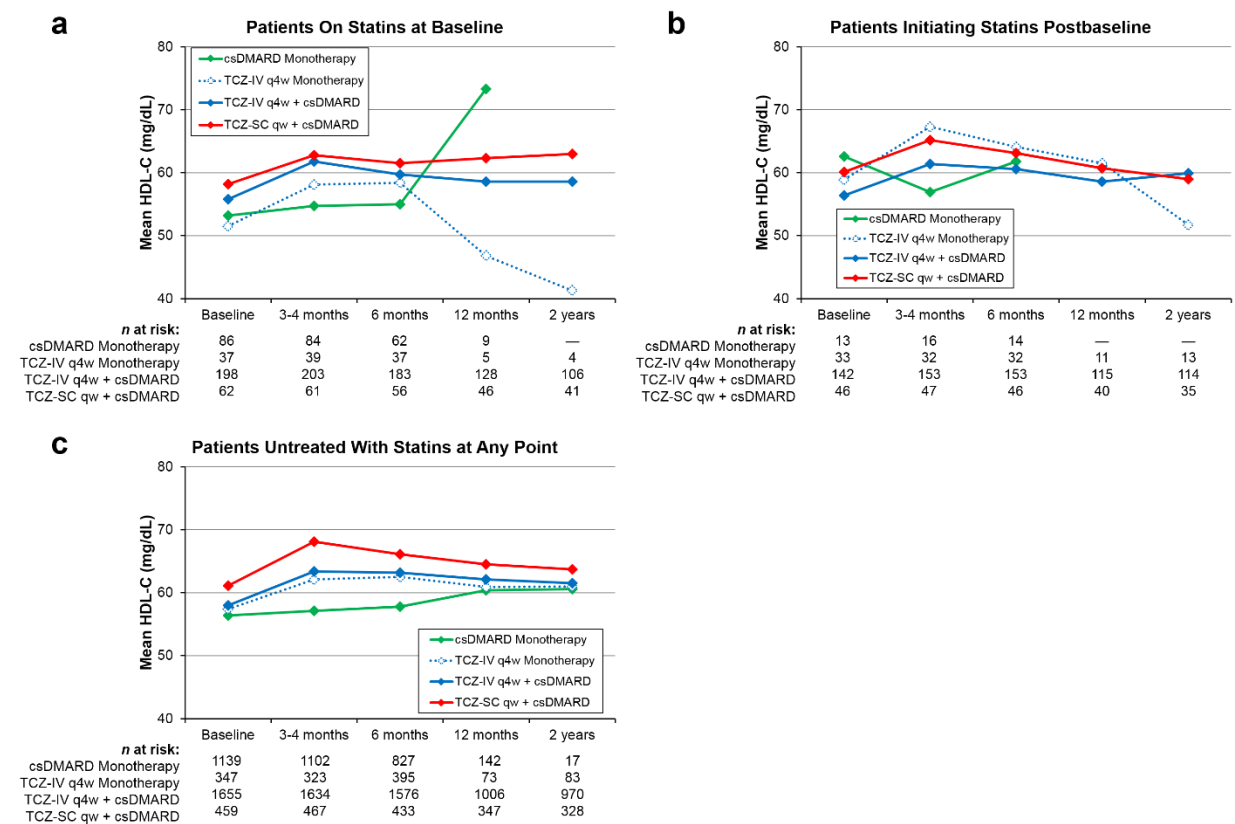

csDMARD conventional synthetic disease-modifying antirheumatic drug, HDL-C high-density lipoprotein cholesterol, IV intravenous, qw every week, q4w every 4 weeks, SC subcutaneous, TCZ tocilizumab.

**Fig. S3.** Mean TG levels over time in patients who were on statins at baseline **(a)**, patients who initiated statins post-baseline **(b)**, and patients who were untreated with statins at any time **(c)**.

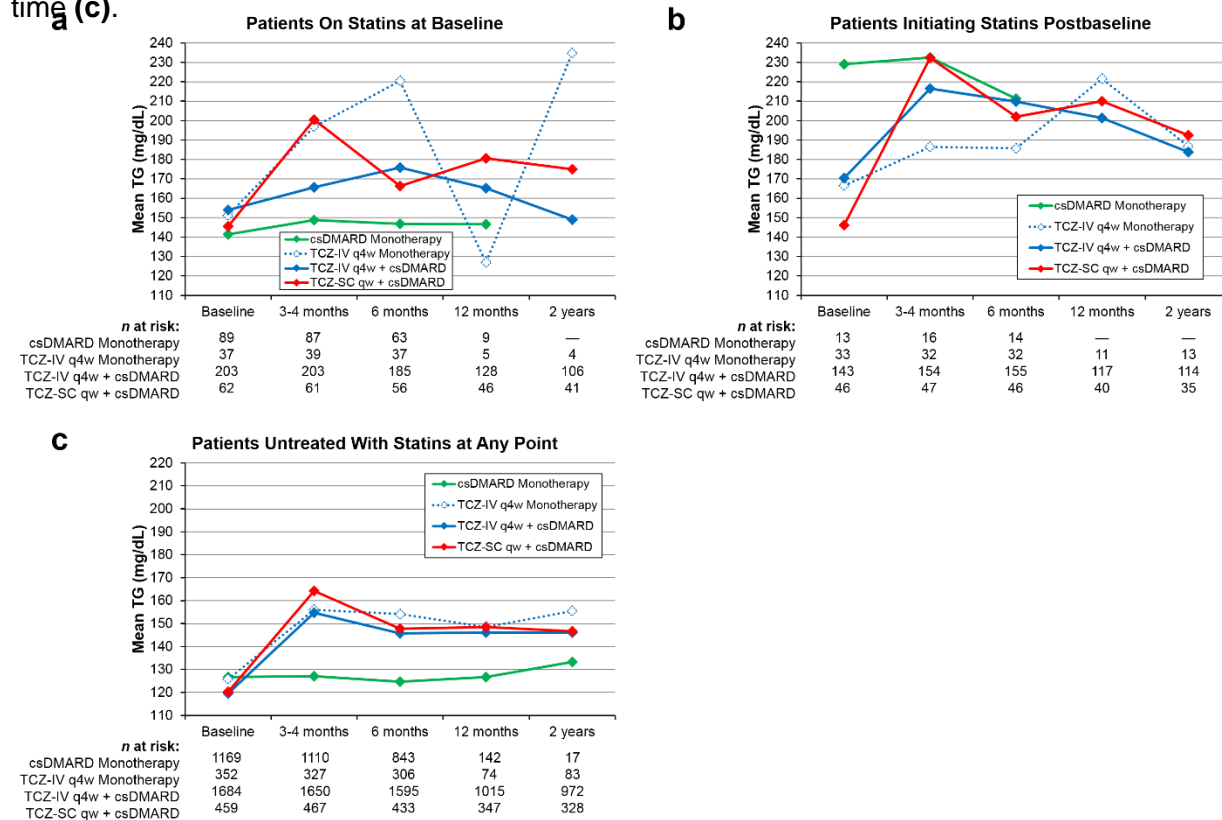

csDMARD conventional synthetic disease-modifying antirheumatic drug, IV intravenous, qw every week, q4w every 4 weeks, SC subcutaneous, TG triglyceride, TCZ tocilizumab.
